# Supplementary material
Source: PubMed Central journal article supplement (PMC4040145)
Supplement: NIHMS580885-supplement-01.pdf [file NIHMS580885-supplement-01.pdf]

**Supplement:****Supplement 1****Models evaluated for PHQ-9 and EPDS and corresponding fit indices using confirmatory factor analysis**

| Model reference  | Factor structure evaluated                       | $\chi^2$   | df        | <i>p</i> -value   | SRMR         | RMSEA (90% CI)              | CFI          |
|------------------|--------------------------------------------------|------------|-----------|-------------------|--------------|-----------------------------|--------------|
| <b>PHQ-9</b>     |                                                  |            |           |                   |              |                             |              |
| Huang [63]       | F1: 1, 2, 3, 4, 5, 6, 7, 8, 9                    | 379        | 27        | <0.0001           | 0.055        | 0.093 (0.085, 0.101)        | 0.897        |
| Krause [40]      | F1: 3, 4, 5; F2: 1, 2, 6, 7, 8, 9                | 356        | 26        | <0.0001           | 0.053        | 0.092 (0.083, 0.100)        | 0.903        |
| Krause [40]      | F1: 3, 4, 5, 8; F2: 1, 2, 6, 7, 9                | 330        | 26        | <0.0001           | 0.051        | 0.088 (0.080, 0.096)        | 0.911        |
| EFA              | F1: 1, 2, 3, 4, 5, 8; F2: 6, 7, 9                | 286        | 26        | <0.0001           | 0.047        | 0.081 (0.073, 0.090)        | 0.924        |
| <b>EFA</b>       | <b>F1: 1, 3, 4, 5, 8; F2: 2, 6, 7, 9</b>         | <b>212</b> | <b>26</b> | <b>&lt;0.0001</b> | <b>0.040</b> | <b>0.069 (0.060, 0.078)</b> | <b>0.946</b> |
| <b>EPDS</b>      |                                                  |            |           |                   |              |                             |              |
| Berle [64]       | F1: 1, 2, 3, 4, 5, 6, 7, 8, 9, 10                | 402        | 35        | <0.0001           | 0.050        | 0.083 (0.076, 0.091)        | 0.906        |
| Tuohy [48]       | F1: 1, 2; F2: 3, 4, 5; F3: 7, 8, 9, 10           | 167        | 25        | <0.0001           | 0.065        | 0.061 (0.053, 0.070)        | 0.960        |
| Tuohy [48]       | F1: 1, 2; F2: 3, 4, 5; F3: 6, 7, 8, 9, 10        | 146        | 32        | <0.0001           | 0.031        | 0.049 (0.041, 0.057)        | 0.971        |
| <b>King [42]</b> | <b>F1: 1, 2; F2: 3, 4, 5, 6; F3: 7, 8, 9, 10</b> | <b>89</b>  | <b>32</b> | <b>&lt;0.0001</b> | <b>0.023</b> | <b>0.034 (0.026, 0.043)</b> | <b>0.985</b> |
| EFA              | F1: 1, 2; F2: 3, 4, 5, 6, 7, 8, 9, 10            | 193        | 34        | <0.0001           | 0.034        | 0.056 (0.048, 0.063)        | 0.959        |

**Supplement 2**  
**PHQ-9 vs. EPDS scores by category <sup>a</sup>**

| EPDS Score                               | PHQ-9 Score          |                              |                                       |                            | Total       |
|------------------------------------------|----------------------|------------------------------|---------------------------------------|----------------------------|-------------|
|                                          | 0-9; “No Depression” | 10-14; “Moderate Depression” | 15-19; “Moderately Severe Depression” | 20-27; “Severe Depression” |             |
| <b>0-9; “Normal”</b>                     | 883 (58.2)           | 80 (5.3)                     | 89 (5.9)                              | 19 (1.3)                   | 1071 (70.6) |
| <b>10, 11; “Slightly increased risk”</b> | 151 (10.0)           | 27 (1.8)                     | 45 (3.0)                              | 35 (2.3)                   | 258 (17.0)  |
| <b>12-15; “Increased risk”</b>           | 51 (3.4)             | 16 (1.1)                     | 28 (1.9)                              | 32 (2.1)                   | 127 (8.4)   |
| <b>≥16; “Marked risk”</b>                | 8 (0.5)              | 6 (0.4)                      | 12 (0.8)                              | 35 (2.3)                   | 61 (4.0)    |
| <b>Total</b>                             | 1093 (72.1)          | 129 (8.5)                    | 174 (11.5)                            | 121 (8.0)                  | 1517(100.0) |

<sup>a</sup> All values provided as n (%).

**Supplement 3**

**Agreement (Cohen’s kappa) between PHQ-9 and EPDS at different cutoff scores in identifying possible depression**

|               | PHQ-9<br>(≥7) | PHQ-9<br>(≥8) | PHQ-9<br>(≥9) | PHQ-9<br>(≥10) | PHQ-9<br>(≥11) | PHQ-9<br>(≥12) | PHQ-9<br>(≥13) | PHQ-9<br>(≥14) | PHQ-9<br>(≥15) | PHQ-9<br>(≥16) | PHQ-9<br>(≥17) | PHQ-9<br>(≥18) | PHQ-9<br>(≥19) |
|---------------|---------------|---------------|---------------|----------------|----------------|----------------|----------------|----------------|----------------|----------------|----------------|----------------|----------------|
| EPDS<br>(≥7)  | 0.336         | 0.333         | 0.324         | 0.286          | 0.270          | 0.244          | 0.234          | 0.208          | 0.198          | 0.188          | 0.164          | 0.137          | 0.113          |
| EPDS<br>(≥8)  | 0.332         | 0.334         | 0.330         | 0.310          | 0.301          | 0.276          | 0.268          | 0.247          | 0.231          | 0.217          | 0.192          | 0.168          | 0.139          |
| EPDS<br>(≥9)  | 0.325         | 0.332         | 0.328         | 0.324          | 0.323          | 0.306          | 0.300          | 0.279          | 0.264          | 0.250          | 0.229          | 0.202          | 0.167          |
| EPDS<br>(≥10) | 0.334         | 0.345         | 0.352         | 0.359          | 0.362          | 0.346          | 0.342          | 0.323          | 0.302          | 0.295          | 0.277          | 0.242          | 0.199          |
| EPDS<br>(≥11) | 0.309         | 0.318         | 0.337         | 0.351          | 0.356          | 0.346          | 0.348          | 0.343          | 0.316          | 0.310          | 0.291          | 0.257          | 0.214          |
| EPDS<br>(≥12) | 0.293         | 0.300         | 0.326         | 0.353          | 0.364          | 0.364          | 0.369          | 0.369          | 0.344          | 0.345          | 0.325          | 0.299          | 0.259          |
| EPDS<br>(≥13) | 0.248         | 0.249         | 0.275         | 0.303          | 0.311          | 0.317          | 0.328          | 0.340          | 0.338          | 0.342          | 0.327          | 0.301          | 0.265          |
| EPDS<br>(≥14) | 0.222         | 0.228         | 0.256         | 0.304          | 0.314          | 0.325          | 0.346          | 0.360          | 0.360          | 0.362          | 0.371          | 0.352          | 0.317          |
| EPDS<br>(≥15) | 0.192         | 0.207         | 0.230         | 0.276          | 0.293          | 0.311          | 0.332          | 0.353          | 0.361          | 0.368          | 0.381          | 0.374          | 0.349          |
| EPDS<br>(≥16) | 0.161         | 0.189         | 0.225         | 0.268          | 0.289          | 0.312          | 0.347          | 0.367          | 0.373          | 0.393          | 0.407          | 0.398          | 0.378          |
| EPDS<br>(≥17) | 0.129         | 0.163         | 0.196         | 0.237          | 0.266          | 0.282          | 0.334          | 0.377          | 0.382          | 0.403          | 0.425          | 0.425          | 0.415          |
| EPDS<br>(≥18) | 0.099         | 0.124         | 0.155         | 0.193          | 0.214          | 0.246          | 0.293          | 0.336          | 0.331          | 0.365          | 0.392          | 0.406          | 0.432          |
| EPDS<br>(≥19) | 0.077         | 0.099         | 0.124         | 0.156          | 0.176          | 0.211          | 0.257          | 0.301          | 0.313          | 0.346          | 0.392          | 0.432          | 0.462          |
